# Supplementary material
Source: publisher figshare collection journal article supplement (https://acs.figshare.com/ndownloader/files/4185223)
Supplement: Supplementary file 1 [file 4185223]

# The Excited State Electronic Properties of 6-methylisoxanthopterin (6-MI): An Experimental and Theoretical Study

*Goutham Kodali<sup>1,2</sup>, Madhavan Narayanan<sup>1</sup>, and Robert J. Stanley<sup>1\*</sup>.*

<sup>1</sup>Department of Chemistry, Temple University, Philadelphia, Pennsylvania 19122 <sup>2</sup>Department of Biochemistry and Biophysics, University of Pennsylvania School of Medicine, 1004 Stellar-Chance Building, 422 Curie Blvd, Philadelphia, PA 19104-6059

---

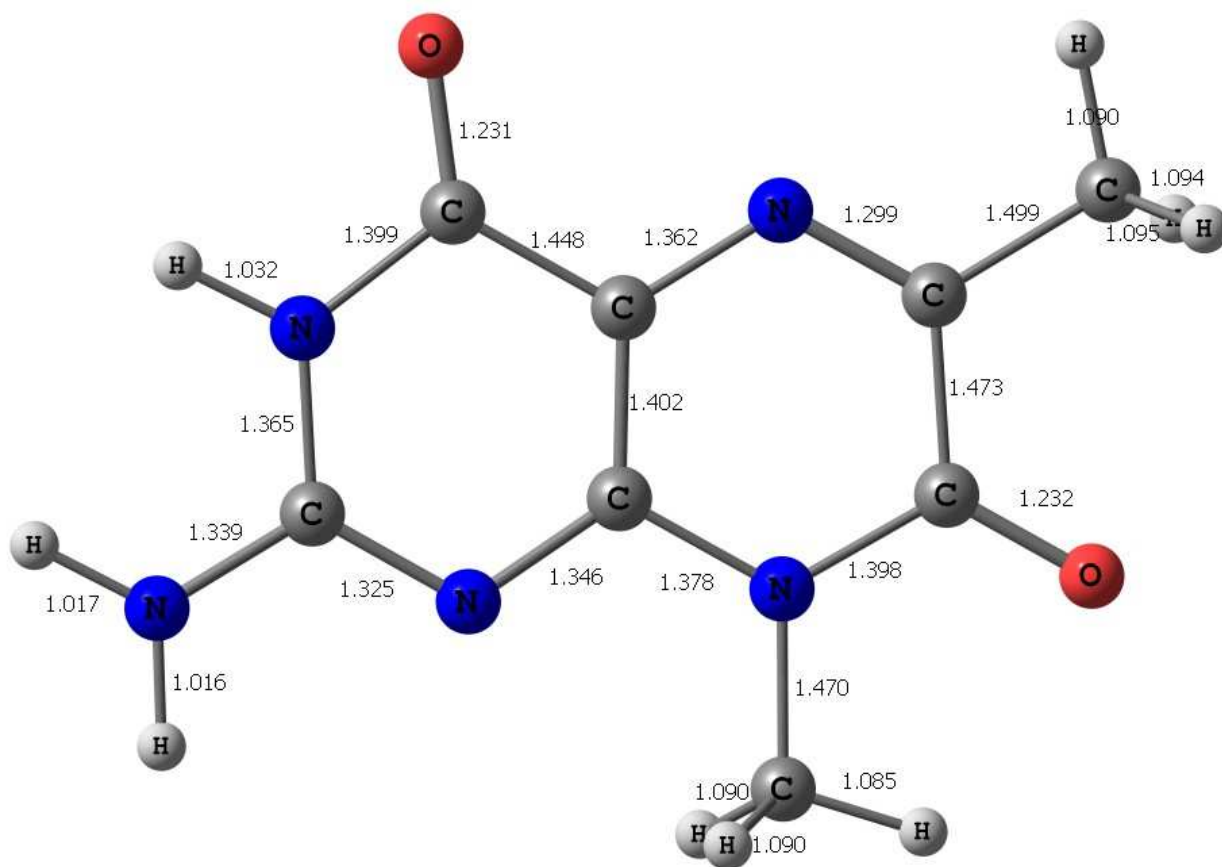

Figure S1: The ground state optimized geometry of 6,8-DMI at B3LYP/6-311+G(d,p) level of theory using water as the PCM solvent.
